# Supplementary material
Source: PubMed Central journal article supplement (PMC2841938)
Supplement: 0911220107_pnas.200911220SI.pdf [file 0911220107_pnas.200911220SI.pdf]

# Supporting Information

Liu et al. 10.1073/pnas.0911220107

## SI Materials and Methods

**Western Blotting and Immunohistochemistry.** Cells were lysed in PBS containing 0.5% Triton, protease inhibitor mixture (Roche), and 1 mM PMSF at 4°C for 30 min. Equal quantities of protein were subjected to SDS/PAGE under reducing conditions. Following transfer to Immobilon-P membranes, successive incubations with primary and HRP-conjugated secondary antibodies (Amersham Life Science) were performed according to the manufacturer's specifications. Immunoreactive proteins were detected using the ECL system. For immunohistochemical staining, tumors were fixed in 10% buffered formalin for 48 h, transferred to 70% ethanol/PBS, and embedded in paraffin. Sections were cleared in a graded xylene/ethanol series and treated with 3% hydrogen peroxide/H<sub>2</sub>O for 20 min. Antigens were retrieved by steaming in citrate buffer (pH 6.0) for 20 min, and sections were blocked and incubated with the primary antibody at 4°C overnight. After successive incubations with the corresponding biotin-conjugated secondary antibody and ABC Elite reagent (Vector Laboratories), antigens were detected using diaminobenzidine (DAB) (Vector Laboratories) as the chromogenic substrate. Slides were counterstained with hematoxylin, dehydrated, and mounted. H&E staining was performed on tumor xenograft tissue, skin, and intestine harvested at the end of Mesd treatment.

**Construct, Nucleofection, and Transfection.** LRP6 was subcloned into the mLRP4T100 backbone the construction of which has been described previously (1). For rescue experiments, a codon-modified LRP6-Res construct was generated using the Quik-Change Site-Directed Mutagenesis kit (Stratagene). The shRNA-targeted sequence was replaced with CTGAGGTGTAAC, which does not change the amino acid composition of LRP6 but renders the construct insensitive to LRP6-specific shRNA. The modified LRP6 cDNA was confirmed by sequencing. Nucleofactor (Amaya Biosystems) was used for transfection of DNA into MDA-MB-231 or T-47D cells according to the manufacturer's instructions. Fugene 6 (Roche) was used for transfection of HCC1187 cells according to the manufacturer's instructions.

**Quantitative Real-Time PCR.** Total RNAs isolated from breast cancer and control cells using TRIzol (Invitrogen) and RNeasy Mini Kit (Qiagen) were reverse-transcribed with SuperScript First-Strand Synthesis System (Invitrogen). The reaction mix was subjected to quantitative real-time PCR to detect expression levels of LRP6 and other Wnt-related genes using human quantitative PCR primers specific for corresponding genes and RT<sup>2</sup> Profiler PCR Arrays (SABiosciences). All primers for real-time PCR were ordered from SABiosciences. Triplicate reactions were prepared using a 25- $\mu$ l mixture containing Platinum SYBR Green qPCR Super Mix UDG (Invitrogen). Real-time quantification was performed on a Bio-Rad iCycle iQ system. Serial 10-fold dilutions of cDNA were used as references for the standard curve in SuperArray. All data were normalized to the endogenous actin expression.

**Lentiviral Production.** 293T cells were cotransfected with pLKO.1 or pLKO.1-LRP6 shRNA and packaging plasmids pHR'CVM8.2AR

and pCMV-VSV-G using FuGENE 6 (Roche Diagnostics). The virus-containing supernatant was collected for infection of breast cancer cells. For stable cell line generation, cells were selected in growth medium containing 2  $\mu$ g/mL puromycin.

**Cell Growth and Cell Proliferation Assays.** Cell growth was measured by MTT assay (Promega). Breast cancer cells expressing control or LRP6 shRNA were seeded into 48-well plates. MTT-labeling reagent was added to each well 24 h later, and plates were incubated at 37°C for 4 h. After the incubation period, the formazan crystals were dissolved in an MTT solubilization reagent and the resulting color was quantified spectrophotometrically. Cell proliferation was measured by BrdU incorporation using the BrdU ELISA kit (Roche Molecular Systems) according to the manufacturer's instructions. Briefly, cancer cells expressing control or LRP6 shRNA were plated on 96-well plate. Cells were incubated with BrdU for 24 h, and the newly synthesized BrdU-DNA was then determined by colorimetry using an ELISA reader. All experiments were performed three times in triplicate.

**Soft Agar Tumorigenicity Assays.** A 1-mL bottom layer consisting of 1% agar medium was added to six-well plates. MDA-MB-231 cells expressing control or LRP6 shRNA were trypsinized, centrifuged, resuspended in 0.5% agar medium (equal volumes of 1% agar and 2 $\times$  culture medium), and plated at 1,000 cells/well as a top layer. Cells were incubated for 3 weeks at 37°C until colony formation and colonies were stained with 0.5% Crystal Violet for counting.

**Apoptosis Analysis.** Apoptosis of cancer cells expressing control shRNA or LRP6 shRNA was detected using a TUNEL kit (Upstate) according to the manufacturer's protocol. Cells were counterstained with DAPI and examined by fluorescent microscopy.

**GST-E-Cadherin Pull-Down Assay.** The GST-E-cadherin pull-down assay was performed as previously described (2). Cells expressing control or LRP6 shRNA were treated with L cells or Wnt3a-conditioned media (CM) for 4 h. Free  $\beta$ -catenin was determined using a GST-E-cadherin pull-down assay. Cells were lysed for 30 min at 4°C. Protein concentrations in lysates were quantified, and equal quantities of total proteins from different samples were incubated with GST-E-cadherin Sepharose beads for 4 h at 4°C. After incubation, the beads were washed three times, and the bound proteins were eluted and separated via SDS/PAGE. Western blotting was performed using antibody to  $\beta$ -catenin.

**Luciferase Reporter Assay.** To examine reporter activities in response to Wnt3a stimulation and/or  $\beta$ -catenin expression, cells expressing control or LRP6 shRNA were transfected with TOP-Flash/FOPFlash plasmids (Upstate) and treated with conditioned media from parental L cell or Wnt3a-expressing cultures (3) for 24 h. A  $\beta$ -gal reporter cDNA was cotransfected to normalize data for transfection efficiency. The luciferase and  $\beta$ -gal activities were measured by the Luciferase and  $\beta$ -gal Assay Systems, respectively, following the instructions of the manufacturer (Promega).

1. Bu G, Rennke S (1996) Receptor-associated protein is a folding chaperone for low density lipoprotein receptor-related protein. *J Biol Chem* 271:22218–22224.  
2. Bafico A, Gazit A, Wu-Morgan SS, Yaniv A, Aaronson SA (1998) Characterization of Wnt-1 and Wnt-2 induced growth alterations and signaling pathways in NIH3T3 fibroblasts. *Oncogene* 16:2819–2825.

3. Shibamoto S, et al. (1998) Cytoskeletal reorganization by soluble Wnt-3a protein signalling. *Genes Cells* 3:659–670.
